# Supplementary material
Source: publisher figshare collection journal article supplement (https://acs.figshare.com/ndownloader/files/24147038)
Supplement: Supplementary file 1 [file 24147038]

1 *Supporting Information*

2 **Hydrophilic and Electroneutral Nanoparticles to Overcome Mucus**  
3 **Trapping and Enhance Oral Delivery of Insulin**

4

5 Xinyi Tan<sup>†</sup>, Na Yin<sup>†</sup>, Zixu Liu<sup>†</sup>, Rong Sun<sup>†</sup>, Jingxin Gou<sup>†</sup>, Tian Yin<sup>‡</sup>, Yu Zhang<sup>†</sup>, Haibing He<sup>\*,†</sup> and  
6 Xing Tang<sup>\*\*,†</sup>

7

8

9 <sup>†</sup>Department of Pharmaceutics, Shenyang Pharmaceutical University, Wen Hua Road No. 103,  
10 110016, Shenyang, China

11 <sup>‡</sup>Department of Traditional Chinese Materia Medica, Shenyang Pharmaceutical University, Wen Hua  
12 Road No. 103, 110016, Shenyang, China

13

14

15 **Corresponding author:**

16 **\*Associate Professor Haibing He**

17 Email: hhb\_emily@126.com. Tel: +86 24 23986343. Fax: +86 24 23911736.

18 **\*\*Professor Xing Tang**

19 Email: tanglab@126.com. Tel: +86 24 23986343. Fax: +86 24 23911736.

20

## S1. Determination of encapsulation efficiency of the insulin-loaded nanoparticles

Encapsulation efficiency (EE%), the mass ratio of encapsulated insulin inside nanoparticles, was determined during preparation processes and calculated based on the equation as below.

$$\begin{aligned} \text{EE (\%)} &= \frac{M_{\text{encapsulated insulin}}}{M_{\text{loaded insulin}}} \times 100\% = \frac{M_{\text{loaded insulin}} - M_{\text{unencapsulated insulin}}}{M_{\text{loaded insulin}}} \times 100\% \\ &= \frac{(M_{\text{dosage insulin}} - M_{\text{discarded insulin}}) - M_{\text{unencapsulated insulin}}}{M_{\text{dosage insulin}} - M_{\text{discarded insulin}}} \times 100\% \end{aligned}$$

$M_{\text{encapsulated insulin}}$ ,  $M_{\text{unencapsulated insulin}}$  and  $M_{\text{loaded insulin}}$  were the mass of encapsulated insulin inside nanoparticles, unencapsulated insulin outside nanoparticles and total insulin loaded by nanoparticles, respectively.  $M_{\text{encapsulated insulin}}$  was the difference between  $M_{\text{loaded insulin}}$  and  $M_{\text{unencapsulated insulin}}$ , which was calculated based on the assayed centrifuged supernatant of final insulin-loaded nanoparticles. In addition,  $M_{\text{dosage insulin}}$  and  $M_{\text{discarded insulin}}$  were the added dosage mass and discarded mass.  $M_{\text{dosage insulin}}$  was calculated based on the originally added insulin solution.  $M_{\text{discarded insulin}}$  was calculated based on the discarded solution in washing processes. Concentrations of samples were assayed *via* the HPLC method in the Section 2.6., and mass values were calculated based on the assayed concentrations and dilution ratios.

(1) For INS@MSN without washing processes,  $M_{\text{loaded insulin}}$  was equal to  $M_{\text{dosage insulin}}$ . After centrifugation of INS@MSN, the supernatant was collected and assayed, and then  $M_{\text{unencapsulated insulin}}$  was calculated. The originally added insulin solution for preparation processes was also assayed, and then  $M_{\text{dosage insulin}}$ , namely  $M_{\text{loaded insulin}}$ , was calculated. Finally, EE% was calculated based on the equation.

(2) For INS@MSN@PLA-PEG, the amount of loaded insulin was the difference between the dosage and discarded amount in washing processes. Discarded liquid samples for several times were

collected, diluted and mixed with dichloromethane. After stirring 30 min, the upper aqueous phase was diluted by trifluoroacetic acid solution (1%), and then concentrations were assayed <sup>1</sup>.  $M_{\text{discarded insulin}}$  was the mass sum of discarded liquid samples. The originally added insulin solution for preparation processes was also assayed, and then  $M_{\text{dosage insulin}}$  and further  $M_{\text{loaded insulin}}$  were calculated. After centrifugation of INS@MSN@PLA-PEG, the supernatant was collected and treated as above. Then,  $M_{\text{unencapsulated insulin}}$  was calculated based on the assayed concentrations, and, EE% was calculated based on the equation finally.

(3) For INS@MSN@PLA-PEG-CPP, discarded insulin was produced in washing processes of INS@MSN@PLA-PEG-MAL and INS@MSN@PLA-PEG-CPP. Similar with INS@MSN@PLA-PEG, discarded liquid samples were treated as above.  $M_{\text{discarded insulin}}$  was the mass sum of discarded liquid samples. The originally added insulin solution for preparation processes was also assayed, and then  $M_{\text{dosage insulin}}$  and further  $M_{\text{loaded insulin}}$  were calculated. After centrifugation of INS@MSN@PLA-PEG-CPP, the supernatant was collected and treated as above. Then,  $M_{\text{unencapsulated insulin}}$  was calculated based on the assayed concentrations, and EE% was calculated based on the equation finally.

## Reference

1. Giovino, C.; Ayensu, I.; Tetteh, J.; Boateng, J. S. Development and characterisation of chitosan films impregnated with insulin loaded PEG-b-PLA nanoparticles (NPs): a potential approach for buccal delivery of macromolecules. *Int. J. Pharm.* **2012**, 428, (1-2), 143–151.

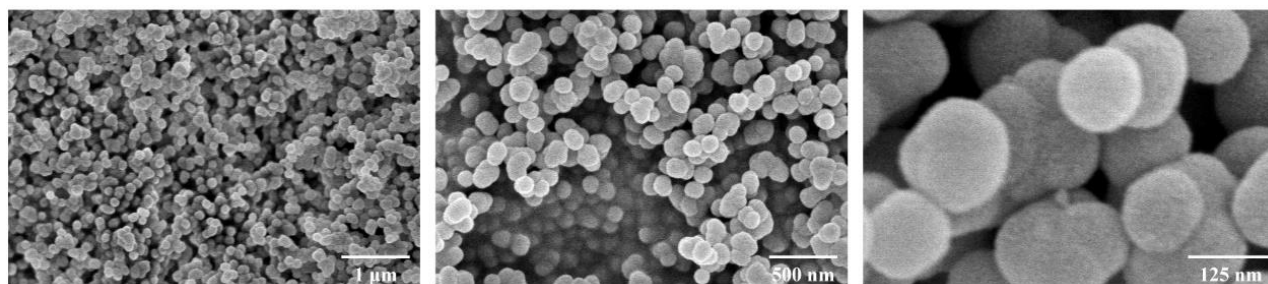

**Figure S1.** SEM images of MSN.

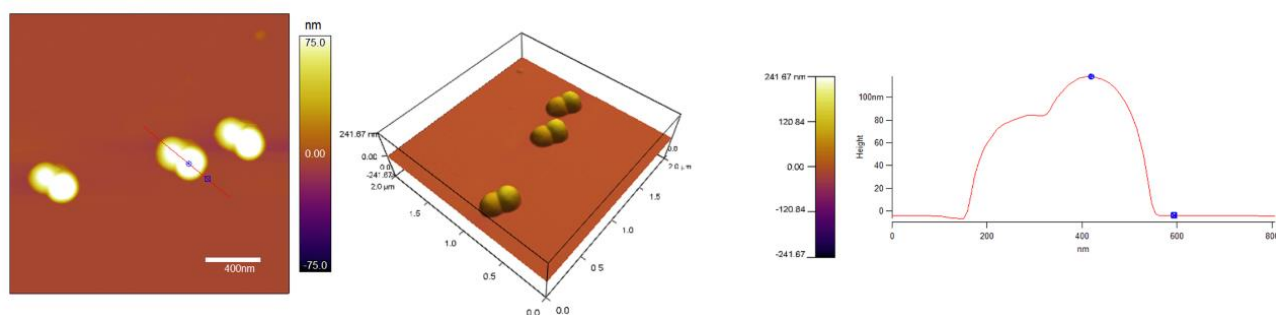

**Figure S2.** AFM images of MSN.

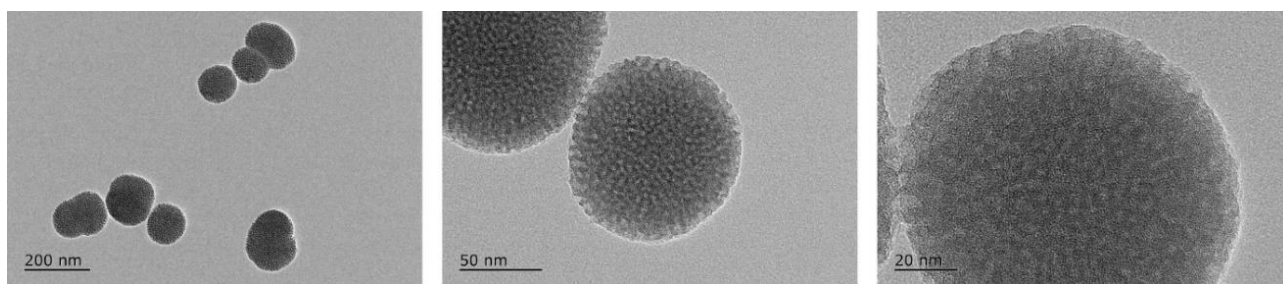

**Figure S3.** TEM images of MSN.

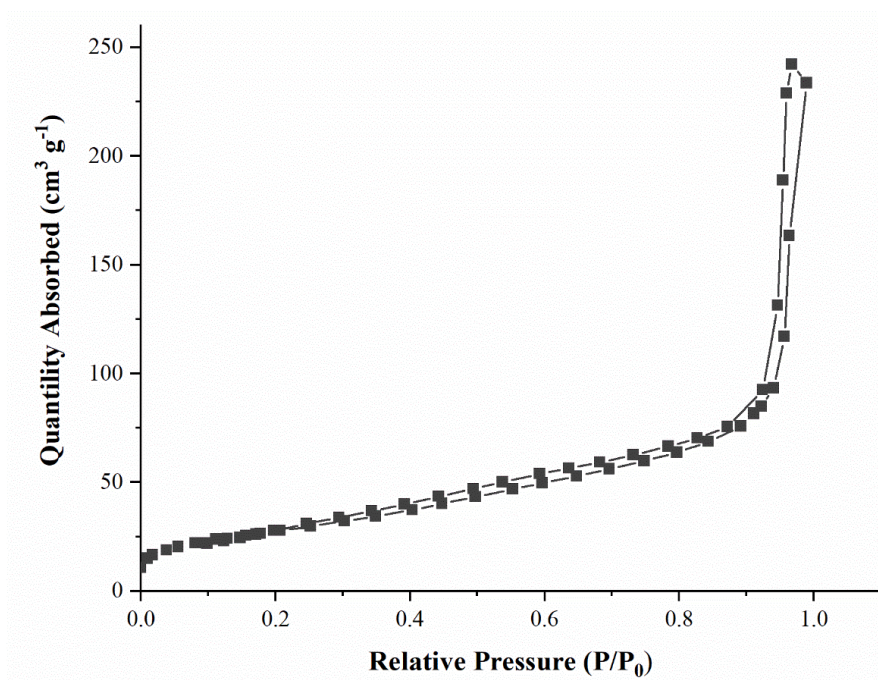

**Figure S4.** N<sub>2</sub> adsorption–desorption isotherms of MSN.

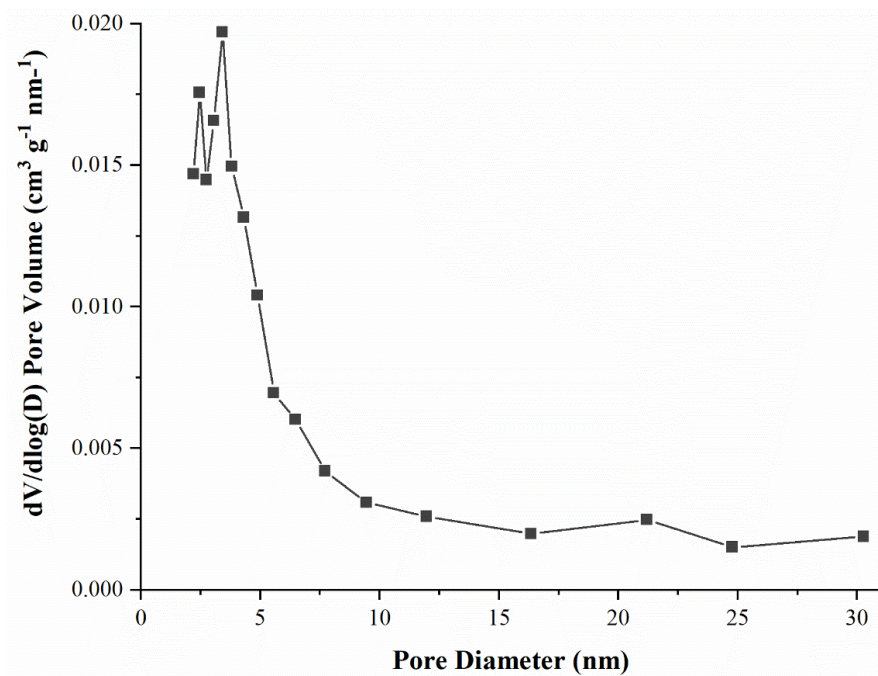

**Figure S5.** Pore diameter distribution of MSN.

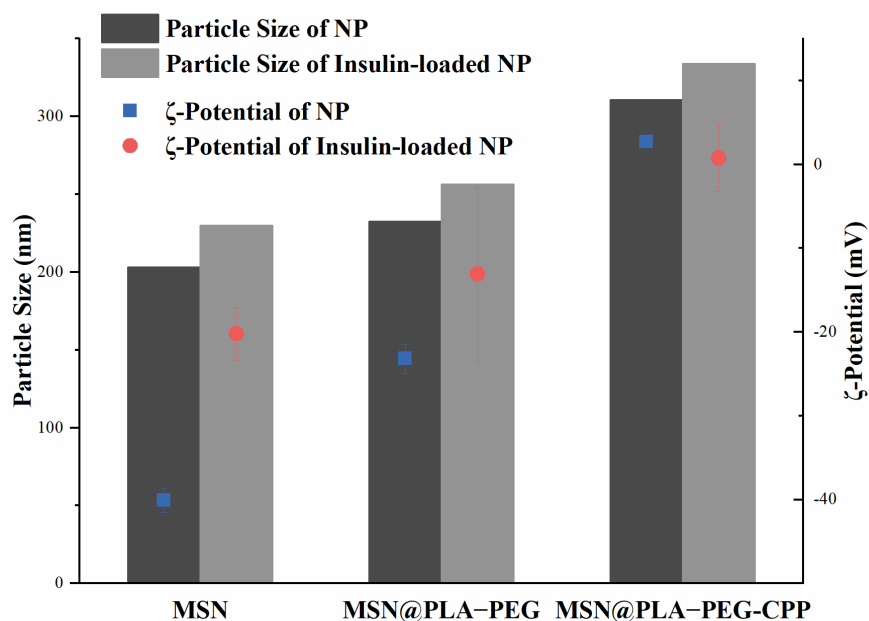

**Figure S6.** Particle size and  $\zeta$ -potential of nanoparticles with or without insulin loading.

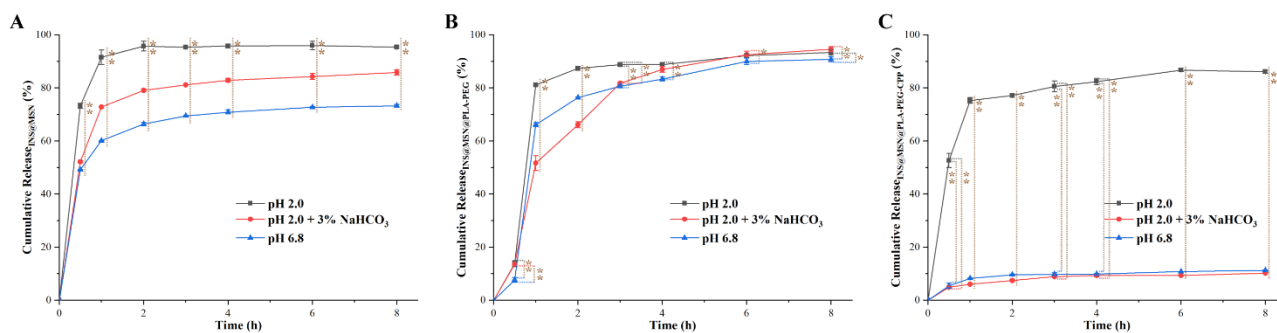

**Figure S7.** Cumulative release behaviors of insulin from (A) INS@MSN, (B) INS@MSN@PLA-PEG, and (C) INS@PLA-PEG-CPP in medium at pH 2.0 (black), pH 2.0 + 3% NaHCO<sub>3</sub> (red), or pH 6.8 (blue). (\* $p < 0.05$  and \*\* $p < 0.01$ )

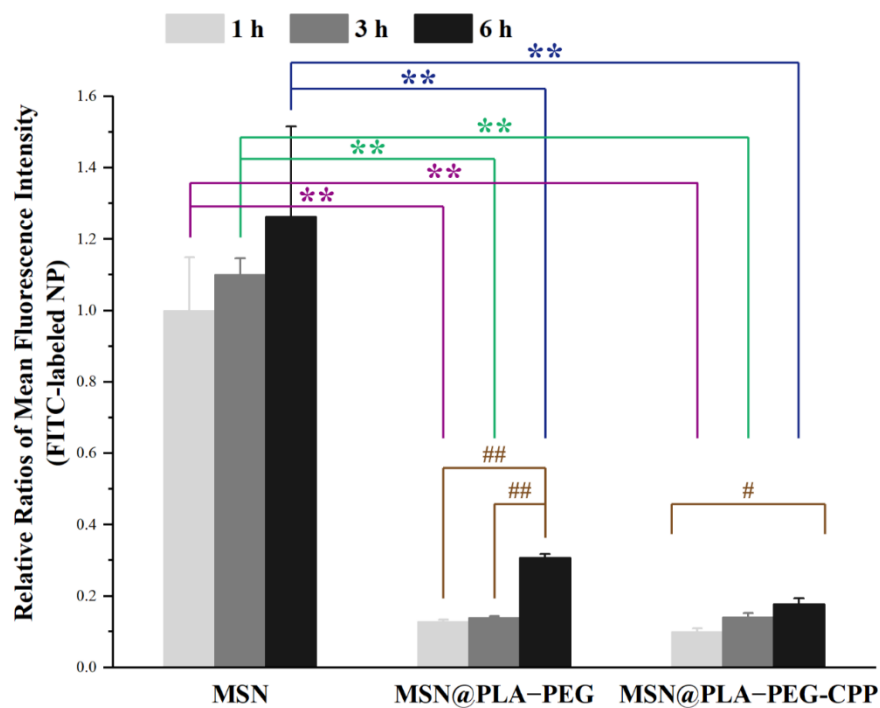

**Figure S8.** Cellular uptake of relative ratios of mean fluorescence intensity and of nonmucous Caco-2 cells incubated with FITC-labeled nanoparticles for different cultured time, compared with that of MSN at 1 h. ( $\#p < 0.05$ ,  $\##p < 0.01$ , and  $**p < 0.01$ ).
